# Supplementary material
Source: PubMed Central journal article supplement (PMC3535175)
Supplement: NIHMS422618-supplement-Supplementary_Table.pdf [file NIHMS422618-supplement-Supplementary_Table.pdf]

|              | <b>ANOVA</b>                             | <b>POST-HOC (Tukey's significant-difference test); df all cases = 6</b> |                    |                     |
|--------------|------------------------------------------|-------------------------------------------------------------------------|--------------------|---------------------|
|              | <b>F-ratio; df; df-error; p value</b>    | <b>day 3-day 6</b>                                                      | <b>day 3-day 9</b> | <b>day 6- day 9</b> |
| <b>NCKX1</b> | F (5.236); df (2); df-e (6); p= 0.048    | p= 0.320                                                                | p= 0.041           | p= 0.299            |
| <b>NCKX3</b> | F (1,525.54); df (2); df-e (6); p= 0.000 | p= 0.000                                                                | p= 0.000           | p= 0.000            |
| <b>NCKX4</b> | F (297.35); df (2); df-e (6); p= 0.000   | p= 0.005                                                                | p= 0.000           | p= 0.000            |
| <b>NCKX5</b> | F (27.38); df (2); df-e (6); p= 0.001    | p= 0.001                                                                | p= 0.002           | p= 0.931            |

**Table S1.** Results from the ANOVA analyses comparing the mRNA transcript values for individual genes for each time group. Post-hoc analyses (Tukey's significant-difference test) were performed to analyze which groups (day 3, 6 or 9) differed.
